# Supplementary material
Source: PubMed Central journal article supplement (PMC4506695)

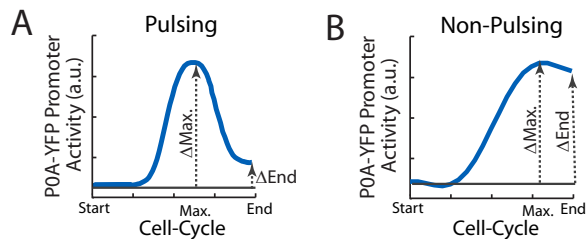

*kinA:OF* imbalance  
Negative Feedback

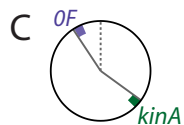

Wildtype

N=149

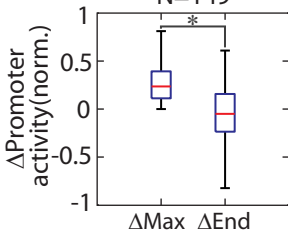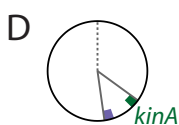

*Trans-OF<sup>gltA</sup>*

N=80

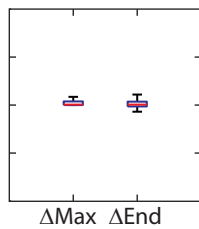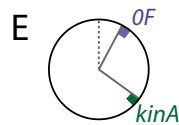

*Trans-OF<sup>amyE</sup>*

N=117

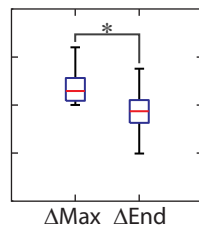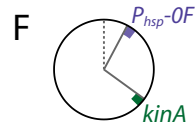

*iOF<sup>amyE</sup>* (5 μM IPTG)

N=62

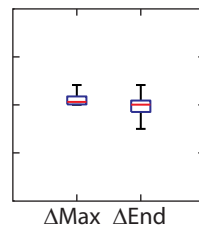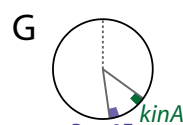

*iOF<sup>gltA</sup>* (5 μM IPTG)

N=64

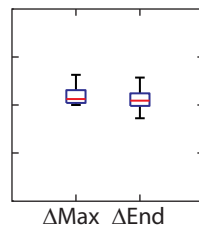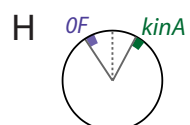

*Trans-kinA<sup>amyE</sup>*

N=50

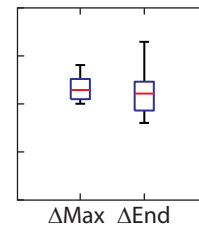

Supplement: NIHMS698701-supplement-5.pdf [file NIHMS698701-supplement-5.pdf]
