# Supplementary material
Source: PubMed Central journal article supplement (PMC4506695)

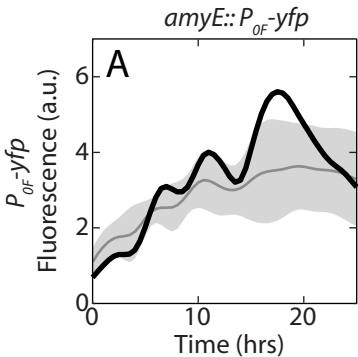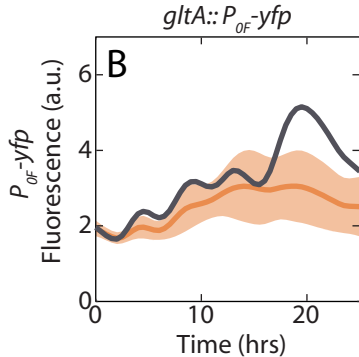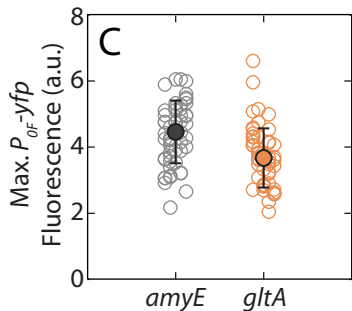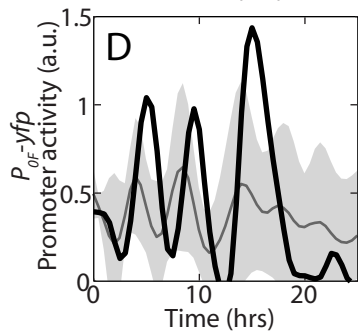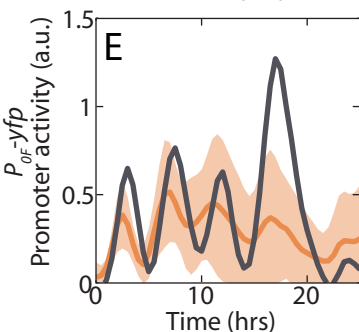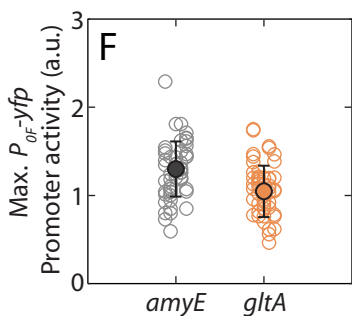

Supplement: NIHMS698701-supplement-1.pdf [file NIHMS698701-supplement-1.pdf]

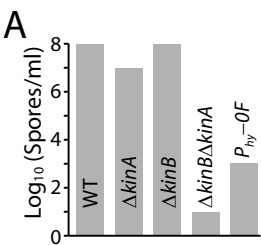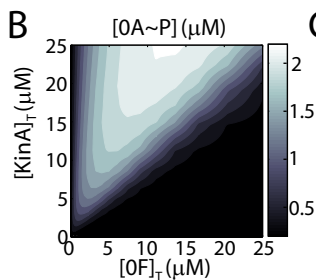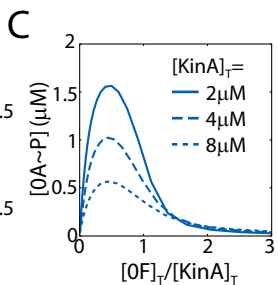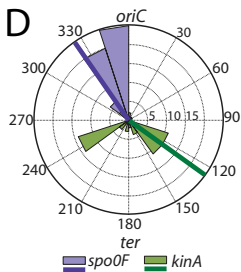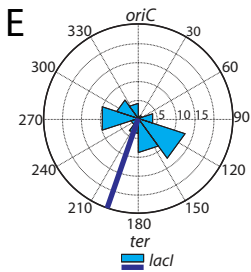

Supplement: NIHMS698701-supplement-2.pdf [file NIHMS698701-supplement-2.pdf]

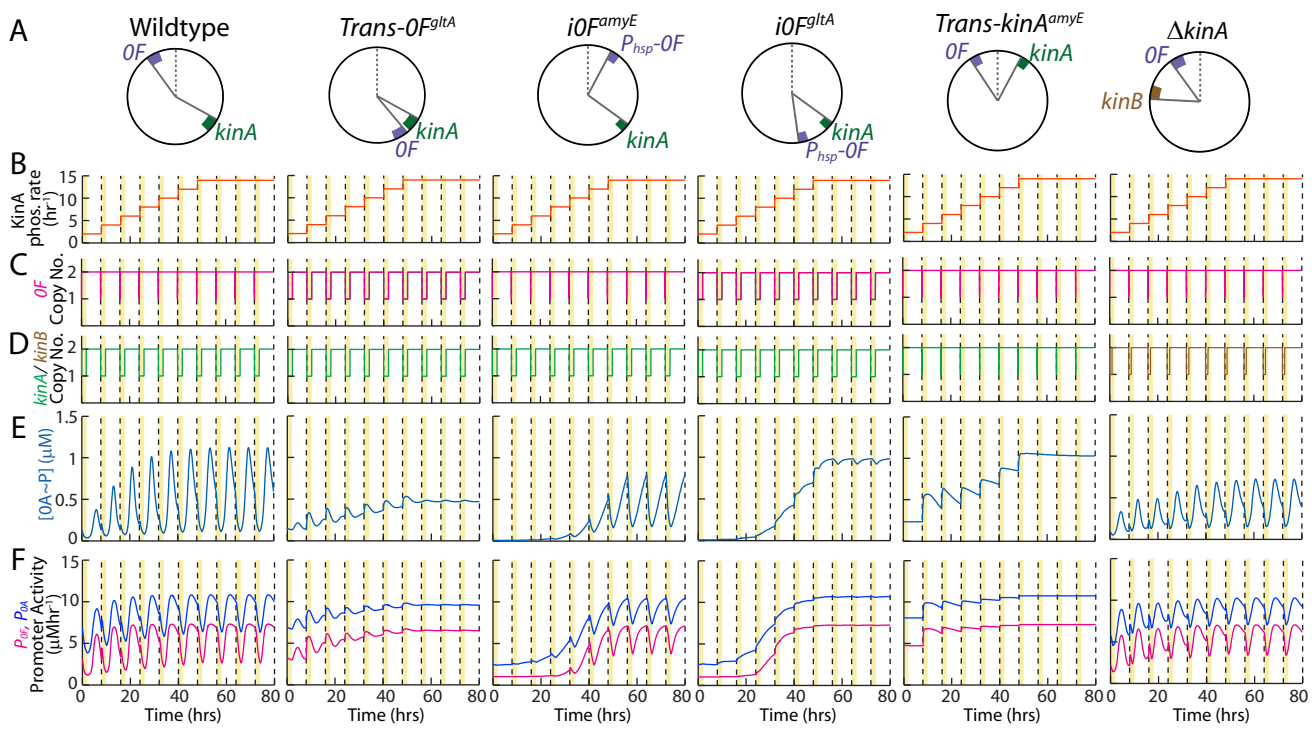

Supplement: NIHMS698701-supplement-3.pdf [file NIHMS698701-supplement-3.pdf]

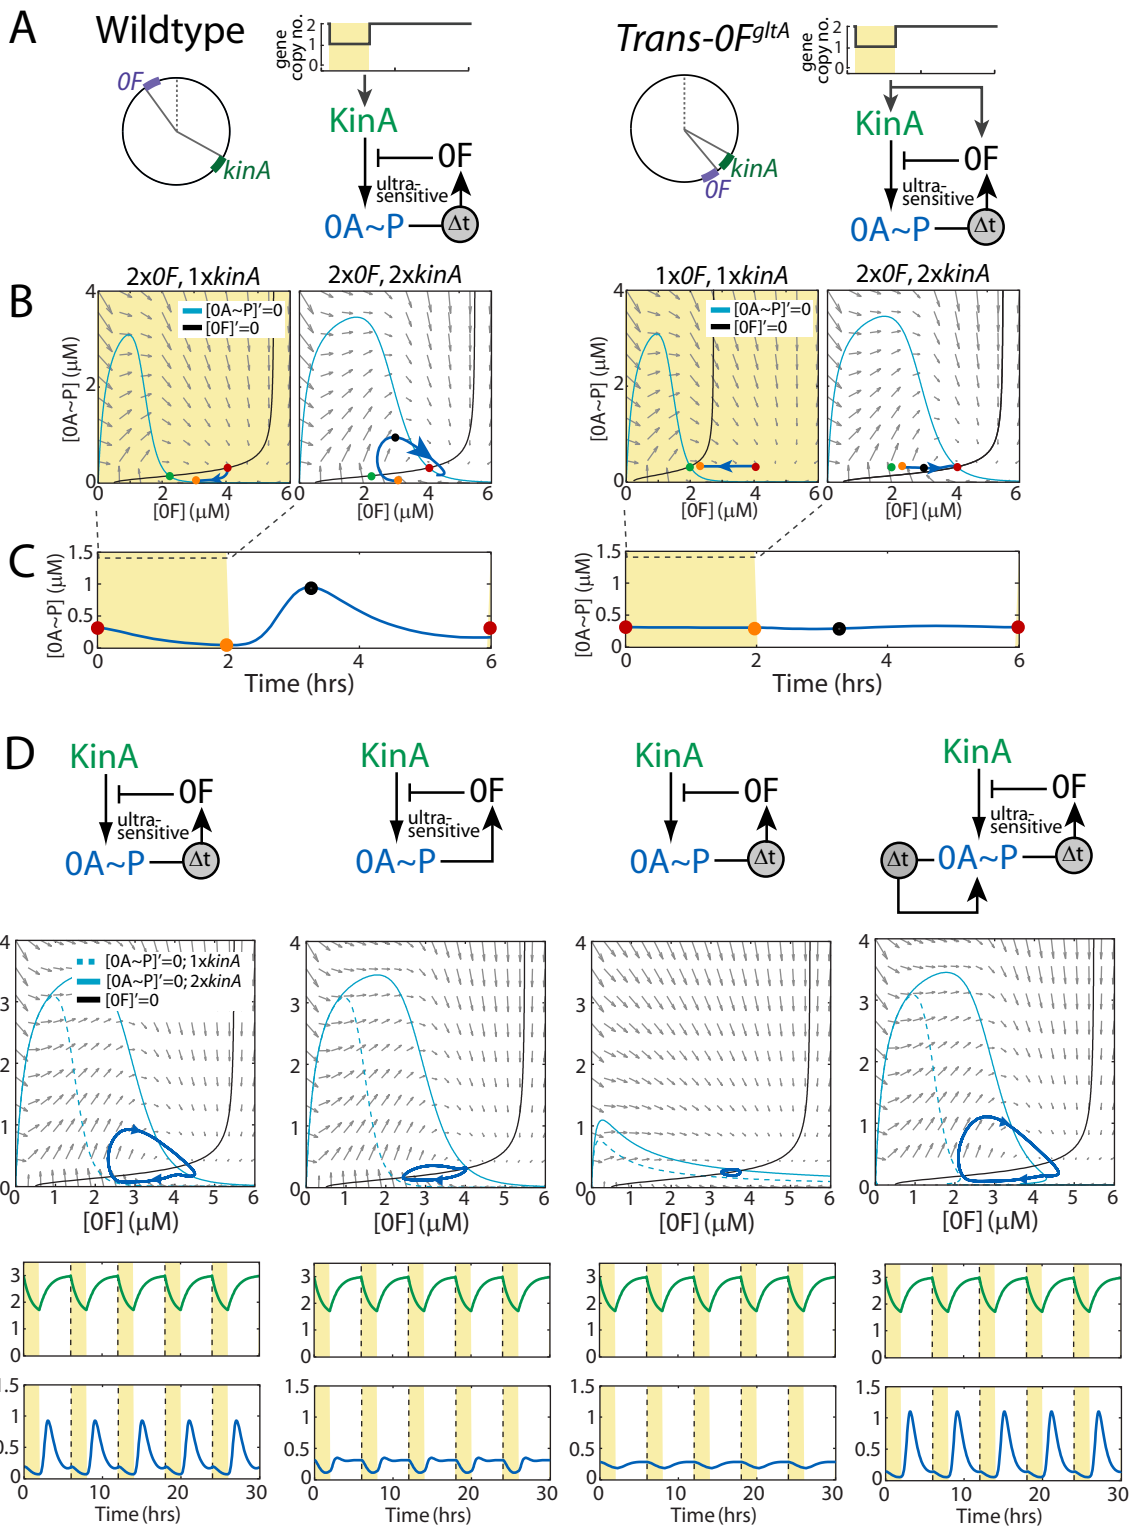

Supplement: NIHMS698701-supplement-4.pdf [file NIHMS698701-supplement-4.pdf]
